# Supplementary material
Source: PubMed Central journal article supplement (PMC7963557)
Supplement: 15-01107.pdf [file 15-01107.pdf]

**On-line Table 1: RIS diagnostic criteria, as defined by Okuda et al,<sup>3</sup> and main clinical reasons/criteria for which patients were excluded**

| Okuda Criteria | Requirements                                                                                                                                               | No. of Excluded Patients | Examples                                                                                                                                                                                                                                                               |
|----------------|------------------------------------------------------------------------------------------------------------------------------------------------------------|--------------------------|------------------------------------------------------------------------------------------------------------------------------------------------------------------------------------------------------------------------------------------------------------------------|
| A              | Incidental WM anomalies in the CNS meeting the following MRI criteria:                                                                                     |                          |                                                                                                                                                                                                                                                                        |
| A1             | Ovoid, well-circumscribed, and homogeneous foci with or without involvement of the corpus callosum                                                         |                          |                                                                                                                                                                                                                                                                        |
| A2             | T2 hyperintensities measuring >3 mm and fulfilling Barkhof criteria (≥3 of 4) for dissemination in space                                                   |                          |                                                                                                                                                                                                                                                                        |
| A3             | CNS WM anomalies not consistent with a vascular pattern <sup>a</sup>                                                                                       |                          |                                                                                                                                                                                                                                                                        |
| B              | No historical accounts of remitting clinical symptoms consistent with neurologic dysfunction                                                               | 13                       | Optic neuritis (n = 4), dysesthesia (n = 4), hemiparesis (n = 3), walking difficulties and positive Babinski sign (n = 1), Lhermitte sign (n = 1)                                                                                                                      |
| C              | The MRI anomalies do not account for clinically apparent impairment in social, occupational, or generalized areas of functioning                           | 3                        | Severe dementia (n = 3)                                                                                                                                                                                                                                                |
| D              | The MRI anomalies are not due to the direct physiologic effects of substances (recreational drug abuse, toxic exposure) or a medical condition             | 2                        | Long-term alcohol abuse (n = 2)                                                                                                                                                                                                                                        |
| E              | Exclusion of individuals with MRI phenotypes suggestive of leukoaraiosis or extensive WM pathology lacking involvement of the corpus callosum <sup>a</sup> |                          |                                                                                                                                                                                                                                                                        |
| F              | The CNS MRI anomalies are not better accounted for by another disease process                                                                              | 22                       | Stroke (n = 5), myocardial infarction (n = 4), malignant tumor with chemotherapy (n = 4), diabetes mellitus type 2 with long-term complications and hypertension (n = 3), transient ischemic attacks (n = 3), aortic stenosis (n = 2), carotid artery stenosis (n = 1) |

<sup>a</sup> Exclusions according to Okuda criteria E and A3 were performed simultaneously.

**On-line Table 2: MRI findings in the clinical radiologic readings in all patients having a brain examination in 2013 (1907 patients, 2272 examinations)<sup>a</sup>**

| MRI Findings                                     | No. |
|--------------------------------------------------|-----|
| Normal findings                                  | 654 |
| Neurodegenerative disorders                      | 718 |
| Degenerative or unspecific white matter changes  | 489 |
| Marked perivascular spaces                       | 50  |
| Other degenerative findings                      | 33  |
| Cerebrovascular disorders                        | 444 |
| Infarctions                                      | 257 |
| Intracranial bleeding                            | 154 |
| Arterial stenosis, dissections                   | 13  |
| Aneurysms                                        | 11  |
| Venous thrombosis                                | 4   |
| Vasculitis                                       | 3   |
| Progressive supranuclear palsy                   | 2   |
| Wernicke encephalopathy                          | 1   |
| Other cerebrovascular disorders                  | 2   |
| Intracranial neoplasms                           | 247 |
| Meningiomas                                      | 104 |
| Gliomas                                          | 59  |
| Suspected neoplasm or neoplasm of unknown origin | 38  |
| Metastasis                                       | 30  |
| Intracranial lipoma                              | 6   |
| Lymphoma                                         | 4   |
| Schwannomas                                      | 3   |
| Other neoplasms                                  | 3   |
| Neuroinflammatory disorders                      | 160 |
| MS findings in patients with known MS            | 121 |
| Other and suspected demyelinating disorders      | 39  |
| Sinonasal disorder                               | 158 |
| Sinusitis, mastoiditis, polyps                   | 156 |
| Other ear/nose pathology                         | 2   |
| Intracranial cysts                               | 94  |
| Arachnoid cysts                                  | 30  |
| Pineal body cysts                                | 28  |
| Neuroglial cyst                                  | 7   |
| Fissure choroid cyst                             | 7   |
| Colloid cyst                                     | 4   |
| Epi-/dermoid cyst                                | 3   |
| Unspecified cysts                                | 15  |
| Malformations                                    | 84  |
| Cavernous venous malformation                    | 20  |
| Developmental venous anomaly                     | 20  |
| Chiari malformations                             | 11  |
| Mega cisterna magna                              | 7   |
| Agenesis of the corpus callosum                  | 5   |
| Dandy-Walker malformations                       | 2   |
| Other malformations                              | 9   |
| Hydrocephalus                                    | 50  |
| Normal pressure hydrocephalus                    | 40  |
| Secondary hydrocephalus                          | 10  |
| Infectious disorders                             | 16  |
| Encephalitis                                     | 5   |
| Meningitis                                       | 5   |
| Other infectious disorders                       | 6   |

<sup>a</sup> Each type of finding is only reported once per patient. Some patients may be represented in several rows due to multiple types of findings.

**On-line Table 3: The main indications for MRI for all persons fulfilling Okuda A for Barkhof and Swanton criteria for DIS**

| Indications for MRI                   | N = 42 (20 + 22) |
|---------------------------------------|------------------|
| Headache                              | 8                |
| Meningioma                            | 5                |
| Convulsions                           | 4                |
| Follow-up of CT findings <sup>a</sup> | 4                |
| Paresis                               | 3                |
| Dementia                              | 3                |
| Decreased visual acuity               | 3                |
| Headache and vertigo                  | 2                |
| Vertigo                               | 2                |
| Dysesthesia                           | 2                |
| Hearing loss                          | 1                |
| Anosmia                               | 1                |
| Mitosis and ptosis                    | 1                |
| Parkinsonism and nystagmus            | 1                |
| Psychosis                             | 1                |
| Trauma                                | 1                |

<sup>a</sup> Suspected intracranial tumor, cyst, and hyper- and hypodensity that needed further investigation with MRI.
